# Supplementary material for: Metagenomic analyses and genetic diversity of Tomato leaf curl Arusha virus affecting tomato plants in Kenya
Source: Research Square preprint supplement (doi:10.21203/rs.3.rs-64787/v2), 2020-12-15
Supplement: Supplementary file 2 [file 191203c511613d40ae7be430.xlsx]

## Sheet: Additional File4 Table S3
	Additional file 4: Table S3. Summary of virus identification from tomato and identity with closest database homologues
	Sample	Length of virus contig (nt)	Virus identified	NCBI Accession number	Similarity (%)	Query cover (%)	Identities	E-value
	Tom 5	2761	Tomato leaf curl Arusha virus	EF194760	97.72	99	2698/2761	0
	Tom 5	2765	Tomato leaf curl Arusha virus	EF194760	97.69	100	2701/2765	0
	Tom 46	2763	Tomato leaf curl Arusha virus	EF194760	96.16	100	2658/2764	0
	Tom 13	2762	Tomato leaf curl Arusha virus	EF194760	95.84	100	2648/2763	0
	Tom 14	2760	Tomato leaf curl Arusha virus	EF194760	98.81	100	2729/2762	0
	Tom 45	2763	Tomato leaf curl Arusha virus	EF194760	98.84	100	2731/2763	0
	Tom 39	2762	Tomato leaf curl Arusha virus	EF194760	97.1	100	2683/2763	0
	Tom 27	2762	Tomato leaf curl Arusha virus	EF194760	98.91	100	2732/2762	0
	Tom 35	2762	Tomato leaf curl Arusha virus	EF194760	96.45	100	2665/2763	0
	Tom 28	2763	Tomato leaf curl Arusha virus	EF194760	95.98	100	2653/2764	0
	Tom 37	2762	Tomato leaf curl Arusha virus	EF194760	95.91	100	2651/2764	0
	Tom 22	2761	Tomato leaf curl Arusha virus	EF194760	96.6	100	2668/2762	0
